# Supplementary material for: Contrast-enhanced Liver MR Synthesis using Gradient Regularized Multi-Modal Multi-Discrimination Sparse Attention Fusion GAN
Source: Preprints.org preprint supplement (doi:10.20944/preprints202305.0705.v1), 2023-05-10
Supplement: Supplementary file 3 [file supplementary]

TABLE s1 Patient Characteristics

| Characteristic | Value | | |
| --- | --- | --- | --- |
| No. of patients | 61 (Male: 45, Female: 16) | | |
| Age, median (range) | 62 (37-83) | | |
| No. of studies | 165 | | |
| Type of liver cancer | | Cholangiocaracinoma:1  Colon:5  Colorectal:1  Esophageal adenoca:1  Gstric:1  HCC:45  Rectal:6  Sigmoid adenocarcinoma:1 | |
| Stage at diagnosis | | | IA:4  IB: 13  II: 25  IIIA: 2  IIIB: 1  IV: 16 |
| Primary vs. Metastatic | | | Primary: 44  Metastatic: 16  Both: 1 |
| Average No. of liver tumors for the ten selected testing patients | | | 2.1 (1-4) |
